# Supplementary material for: Functional genetic variants in complement component 7 confer susceptibility to gastric cancer
Source: PeerJ. 2022 Jan 18;10:e12816. doi: 10.7717/peerj.12816 (PMC8781313; doi:10.7717/peerj.12816)
Supplement: Supplemental Information 2 [file peerj-10-12816-s002.xlsx]

## Sheet: Sheet1
DNA	gene	group	gender	age	Smoking status	Sticks/day	Smoking age	drinking status
G1001	2	1	2	1	0			0
G1003	2	1	2	1	0			0
G1015	1	1	1	0	0			0
G1023	3	1	1	1	1		30	0
G1029	3	1	1	0	0			0
G1039	3	1	1	1	1	20	20	1
G1047	2	1	1	0	0			0
G1061	2	1	1	1	1	20	50	0
G1063	3	1	1	1	0			0
G1086	3	1	1	1	1	10	20	0
G1108	3	1	1	0	1	20	20	0
G1109	3	1	1	0	1	20	20	0
G1145	2	1	1	1	0			0
G1150	2	1	1	1	0			0
G1151	1	1	1	1	0			0
G1184	1	1	1	0	0			0
G1194	3	1	1	1	1	40	30	0
G1202	2	1	1	1	1	40	20	0
G1203	1	1	1	1	0			0
G1291	2	1	1	0	1	20	20	1
G1311	2	1	1	1	0			0
G1324	3	1	2	1	0			0
G1353	2	1	1	1	1	40	40	1
G1359	3	1	2	0	0			0
G1368	2	1	1	1	1	40	30	1
G1372	2	1	1	1	0			0
G1382	3	1	1	1	1	20	30	0
G1394	3	1	1	1	0			1
G1395	1	1	2	0	0			0
G1405	2	1	1	1	0			0
G1438	2	1	1	0	1	20	30	1
G1443	2	1	1	0	1	20	25	0
G1457	2	1	1	1	0			0
G1466	3	1	1	0	0			0
G1468	2	1	1	1	0			0
G1482	3	1	2	0	0			0
G1484	2	1	2	1	0			0
G1485	2	1	1	1	0			0
G1501	3	1	1	0	0			0
G1509	2	1	1	0	0			0
G1519	3	1	1	0	1	10	30	0
G1539	2	1	1	1	1	20	50	1
G1545	2	1	1	0	1	10	30	0
G1562	3	1	2	0	0	0	0	0
G1578	1	1	2	0	0	0	0	0
G1581	3	1	1	0	1	10	30	1
G1622	3	1	1	1	1	20	50	0
G1629	2	1	2	1	0	0	0	0
G1638	2	1	1	1	1	40	30	1
G1650	3	1	1	0	1	20	30	1
G1662	3	1	1	1	1	4	20	1
G1664	3	1	2	0	0	0	0	0
G1677	3	1	1	0	0	0	0	0
G1684	2	1	1	0	1	20	20	1
G1701	2	1	1	0	0	0	0	0
G1723	3	1	1	0	0	0	0	0
G1729	2	1	1	0	1	40	30	1
G1754	2	1	1	1	0	0	0	0
G1791	2	1	1	1	0	0	0	0
G1796	3	1	2	0	0	0	0	0
G1800	2	1	1	1	1	20	40	0
G1804	2	1	1	0	0	0	0	1
G1808	3	1	2	1	0	0	0	0
G1843	3	1	1	1	0	0	0	0
G1902	2	1	1	0	1	20	35	1
G1911	2	1	2	0	0			0
G1925	3	1	1	1	0			0
G1950	3	1	2	1	0			0
G1961	3	1	2	1	0			0
G2025	1	1	1	1	1	20	20	1
G2053	1	1	2	1	0			0
G2067	2	1	1	0	0			0
G2068	2	1	1	1	1	20	40	1
G2078	2	1	1	1	1	30	25	0
G2102	1	1	1	1	1	10	10	0
G2108	2	1	1	1	1	20	30	1
G2110	3	1	1	0	0			0
G2111	2	1	1	1	0			0
G2116	3	1	2	0	0			0
G2118	1	1	1	1	0			0
G2192	3	1	1	0	1	20	40	1
G2203	3	1	1	0	1	10	30	1
G2231	2	1	1	1	0	0	0	0
G2257	2	1	1	1	0	0	0	0
G2274	3	1	1	1	0	0	0	0
G2280	1	1	1	0	0			0
G2286	3	1	2	0	0	0	0	0
G2299	2	1	2	0	0	0	0	0
G2354	3	1	1	0	0	0	0	0
G2358	2	1	1	1	0	0	0	0
G2362	2	1	1	0	0	0	0	0
G2363	2	1	1	0	1	60	18	0
G2374	2	1	1	1	1	20	50	0
G2400	2	1	1	1	0	0	0	0
G2406	2	1	1	1	0	0	0	0
G2414	3	1	1	0	1	20	40	0
G2441	3	1	1	1	0	0	0	0
G2442	2	1	1	1	0	0	0	0
G2450	2	1	2	0	0	0	0	0
G2451	2	1	2	1	0	0	0	0
G2478	2	1	2	1	0	0	0	0
G2490	3	1	1	0	0	0	0	0
G2515	3	1	1	1	0	0	0	0
G2516	2	1	1	1	1	20	40	1
G2524	2	1	1	0	0	0	0	0
G2527	2	1	2	0	0	0	0	0
G2554	2	1	1	0	0	0	0	0
G2562	2	1	2	1	1	60	50	0
G2596	3	1	2	1	0			0
G2621	2	1	2	1	0	0	0	0
G2633	1	1	1	0	0	0	0	0
G2649	3	1	2	1	0			0
G2667	1	1	1	1	0	0	0	0
G2676	2	1	2	1	1	30	20	0
G2683	3	1	1	1	0	0	0	0
G2721	3	1	1	0	0	0	0	0
G2729	3	1	1	1	0	0	0	0
G2756	1	1	2	1	0			0
G2813	2	1	1	1	1	20	30	0
G2823	3	1	1	1	1	20	50	1
G2824	3	1	1	0	0			0
G2837	1	1	2	1	0			0
G2866	3	1	2	0	0			0
G2870	3	1	1	0	1	20	30	0
G2888	3	1	2	0	0			0
G2892	1	1	2	0	0			0
G2911	2	1	1	1	1	5	30	1
G3069	2	1	2	1	0			0
G3094	2	1	1	1	1	20	20	1
G3100	3	1	2	0	0			0
G3121	2	1	2	1	0			0
G3122	2	1	1	1	1	20	20	1
G3127	1	1	2	1	0			0
G3129	1	1	1	0	0			1
G3164	3	1	1	0	0			0
G3165	3	1	1	1	1	40	40	1
G3199	2	1	2	0	0			0
G3200	1	1	2	0	0			0
G3211	3	1	1	1	0			0
G3219	3	1	1	0	1	40	40	1
G3220	1	1	2	0	0			0
G3243	1	1	1	0	0			0
G3252	3	1	1	0	0			0
G3268	3	1	2	0	0			0
G3331	3	1	1	1	0			0
G3345	3	1	1	0	0	0	0	0
G3353	3	1	1	0	1	5	20	1
G3371	1	1	1	1	0	0	0	0
G3382	1	1	1	1	1	20	30	1
G3421	2	1	1	1	1	旱烟6~7	50	1
G3502	2	1	1	1	0			0
G3563	2	1	1	0	1	10	20	0
G3569	3	1	1	1	1	20	60	1
G3579	2	1	1	1	1	20	40	1
G3589	2	1	2	0	0			0
G3597	1	1	2	1	0			0
G3616	1	1	2	0	0			0
G3620	3	1	2	1	1	20	30	1
G3640	3	1	1	1	1	30	30	0
G3656	2	1	2	0	0			0
G3663	2	1	1	1	1	20	30	1
G3669	3	1	1	0	1	10	30	0
G3696	3	1	1	1	0			0
G3705	1	1	2	0	0			0
G3722	2	1	1	0	0			0
G3726	1	1	2	1	0			0
G3750	2	1	1	1	1	50	50	0
G3781	3	1	2	0	0			0
G3785	3	1	2	0	0			0
G3814	3	1	1	1	0	0	0	0
G3818	1	1	1	0	0			0
G3831	3	1	1	0	0			0
G3845	3	1	1	0	1	20	20	0
G3862	3	1	1	1	0			0
G3873	3	1	1	1	0			0
G3901	2	1	1	1	0			1
G3913	3	1	1	1	1	20	30	1
G3920	2	1	2	1	0			0
G3921	3	1	2	1	0			0
G3947	2	1	1	0	0			0
G3953	3	1	1	0	1	7~8	20	0
G3957	3	1	1	1	1	20	20	1
G3990	2	1	1	1	1	20	20	1
G4001	2	1	1	1	1	20	20	1
G4069	3	1	2	1	0			0
G4082	3	1	1	0	0			0
G4104	2	1	1	0	0			0
G4108	2	1	1	1	0			0
G4114	3	1	2	1	0			0
G4122	2	1	1	1	0			0
G4127	3	1	1	0	1	20-30	20	0
G4141	2	1	2	1	0			0
G4180	3	1	1	0	1	20	30	0
G4204	2	1	1	1	1	20	30	0
G4205	1	1	2	0	0			0
G4217	1	1	1	0	0			0
G4295	3	1	1	1	0			0
G4304	3	1	2	1	0			0
G4313	3	1	1	1	1	40	40	0
G4318	2	1	1	1	1	20	40	1
G4349	3	1	1	1	1	10	30	0
G4350	3	1	1	0	0			0
G4352	3	1	1	1	0			0
G4356	2	1	1	0	1	20	25	0
G436	3	1	1	1	1	40	40	0
G4364	3	1	2	1	0			0
G4373	3	1	1	0	1	20	25	1
G4389	2	1	2	1	0			0
G4407	3	1	2	0	0			0
G4450	3	1	1	1	0			0
G4457	2	1	2	0	0			0
G4471	2	1	2	0	0			0
G4479	2	1	2	1	0			0
G4485	2	1	2	0	0			0
G4495	3	1	1	1	0	0	0	0
G4506	3	1	1	0	0			0
G453	3	1	1	1	0			0
G4545	3	1	1	0	1	30		1
G4573	3	1	1	0	0			0
G4574	3	1	1	1	0			0
G4575	3	1	2	0	0			0
G4581	2	1	2	1	0			0
G4582	3	1	1	1	0			0
G4588	1	1	1	0	0			0
G4596	3	1	2	1	0			0
G4605	3	1	1	1	0			0
G4614	3	1	1	1	1	30		1
G4623	3	1	1	1	0			0
G4636	2	1	1	1	0			0
G4642	3	1	2	1	0			0
G4648	2	1	1	1	0	0	0	0
G4656	3	1	2	1	0			0
G467	3	1	1	1	0			0
G4671	2	1	1	0	0			0
G4680	2	1	1	0	0			0
G4693	2	1	1	0	0			0
G4705	3	1	1	1	1	不详		0
G4707	2	1	2	0	0			0
G4717	2	1	1	0	0	0	0	0
G4734	1	1	1	0	0	0	0	0
G4784	3	1	1	1	1	20年		0
G4792	3	1	2	1	0			0
G4797	3	1	1	1	1	10	40	1
G4814	3	1	2	1	0			0
G4819	3	1	1	0	0			0
G482	2	1	1	0	0			0
G4828	3	1	1	1	1			1
G4836	2	1	1	0	1		30	1
G4842	2	1	1	1	1		20	1
G485	3	1	1	1	0			0
G4860	3	1	1	0	1		20	0
G4868	2	1	1	1	0			0
G490	2	1	2	1	0			0
G4901	2	1	2	0	0			0
G491	3	1	1	1	0			0
G4961	2	1	1	1	0			0
G4979	3	1	1	0	0			0
G4995	3	1	1	1	1		#######	1
G5000	3	1	1	0	0			0
G5034	1	1	1	0	1		未提供	1
G5040	1	1	2	0	0			0
G5065	1	1	1	1	0			0
G5067	3	1	1	0	1		20	0
G5097	2	1	1	0	1		5	1
G5098	3	1	1	1	0			0
G510	3	1	1	0	1	40	30	1
G5110	2	1	2	1	0			0
G5125	2	1	2	1	0			0
G5163	3	1	1	1	0			0
G5165	3	1	2	0	0			0
G5168	2	1	2	1	0			0
G5174	3	1	1	0	1	少量		0
G5185	2	1	2	1	0			0
G519	2	1	2	1	0			0
G5202	2	1	1	1	0			0
G5215	2	1	2	1	0	0	0	0
G5216	3	1	2	1	0	0	0	0
G5247	3	1	2	0	0	0	0	0
G5251	3	1	1	0	0	0	0	1
G5264	2	1	2	0	0	0	0	0
G5265	2	1	2	0	0			0
G5283	2	1	1	1	0	0	0	0
G5285	2	1	1	1	1	10	40	1
G5292	3	1	1	0	1			0
G5296	3	1	1	1	0	0	0	0
G5300	3	1	2	1	0	0	0	0
G5304	2	1	1	1	1	20	50	1
G584	2	1	2	0	0			0
G595	3	1	1	0	0			0
G597	3	1	1	1	1	20	20	1
G606	2	1	1	1	0			0
G608	2	1	2	1	1	7	20	0
G630	2	1	1	0	0			0
G659	3	1	1	0	0			0
G661	3	1	1	1	0			0
G663	2	1	2	0	0			0
G672	3	1	1	1	0			1
G683	3	1	2	1	0			0
G696	1	1	1	1	1	7	30	1
G713	3	1	2	1	0			0
G729	3	1	1	1	0			0
G734	2	1	1	1	0			0
G737	3	1	1	1	1	10	20	1
G741	2	1	1	0	1	20	20	1
G746	3	1	2	0	0			0
G763	3	1	1	0	1	40	无	1
G809	2	1	1	0	1	15	30	0
G815	3	1	1	0	1	20	30	0
G816	2	1	1	0	0			0
G820	3	1	2	0	0			0
G821	3	1	2	1	0			0
G866	3	1	1	1	1	10	40	0
G883	2	1	2	0	0			0
G897	3	1	1	1	1	10	20	0
G907	2	1	2	0	0			0
G908	3	1	1	1	0			0
G909	3	1	2	1	0			0
G911	2	1	1	1	1	20	20	1
G914	3	1	2	0	0			0
G920	3	1	1	0	0			0
G938	3	1	2	1	0			0
G946	3	1	1	1	0			0
G970	2	1	1	0	0			1
G991	3	1	1	0	0	0	0	0
L12	3	1	1	1	0			0
L131	3	1	1	1	1	10	30	0
L166	2	1	1	1	1	10	30	1
L169	3	1	2	1	0			0
L183	3	1	1	1	0			0
L214	2	1	2	1	0			0
L26	1	1	1	1	0			0
L264	2	1	1	0	0			0
L275	2	1	2	0	0			0
L282	3	1	1	0	1	40	30	1
L295	1	1	1	0	0			0
L315	3	1	1	1	0			0
L330	3	1	1	1	0			0
L344	3	1	1	1	0			0
L362	2	1	2	1	0			0
L43	1	1	1	1	0			0
L55	3	1	2	0	0			0
L71	1	1	2	1	1	10	20	0
L77	2	1	1	1	0			0
L83	3	1	1	1	0			0
R1042	2	1	2	0	0			0
R1048	2	1	1	1	0			0
R1068	1	1	1	0	0			0
R1075	2	1	2	0	0			0
R1076	1	1	1	0	0			0
R1079	3	1	1	1	0			0
R1084	3	1	1	0	0			0
R1104	2	1	1	0	1	20	20	0
R1110	2	1	1	1	1	20	20	0
R1118	3	1	2	0	0			0
R1142	1	1	1	1	1	20	30	0
R1143	2	1	1	1	0			0
R1144	2	1	1	1	0			0
R1146	3	1	1	0	0			1
R1157	2	1	1	1	0			0
R1159	1	1	1	1	0			0
R117	3	1	1	0	1	10	20	0
R1170	1	1	1	1	0			0
R1191	3	1	2	0	0			0
R1194	2	1	1	0	0			0
R1197	3	1	1	1	0			1
R1215	3	1	1	0	1	2	30	1
R1222	3	1	1	0	1	20	40	0
R123	2	1	2	0	0			0
R1236	3	1	2	0	0			0
R1263	2	1	1	1	1	15	40	0
R1285	1	1	1	1	0			1
R1291	1	1	1	0	1	20	30	1
R1326	2	1	1	1	0			0
R1339	3	1	1	1	1		10	1
R1370	3	1	1	1	1	40	40	1
R1376	2	1	2	0	0			0
R1410	3	1	2	1	0			0
R1424	3	1	1	1	0			0
R1431	3	1	1	1	1	40	20	1
R146	1	1	1	1	0			1
R1484	1	1	1	1	0			0
R1501	3	1	1	0	1	5	20	0
R1515	3	1	2	0	0			0
R1526	3	1	1	0	1	20	30	0
R1534	3	1	1	0	1	10	45	0
R1554	2	1	1	1	0			0
R1570	2	1	2	0	0			0
R1579	3	1	1	1	0			0
R1607	3	1	1	0	1	10	20	0
R1608	2	1	1	1	0			0
R1612	2	1	1	0	1	20	20	0
R1632	1	1	2	1	0			0
R1674	3	1	1	0	0			0
R1690	2	1	1	1	0			0
R1724	3	1	1	1	1		10	1
R1749	3	1	2	1	0			0
R1761	1	1	1	1	1	40	40	0
R1767	2	1	1	1	0			0
R1792	3	1	2	0	0			0
R1797	3	1	1	0	0			0
R1800	3	1	2	0	0			0
R1801	3	1	1	1	0			0
R1819	2	1	1	0	0			0
R1826	1	1	1	1	1	20	30	1
R1828	2	1	2	0	0			0
R1842	2	1	1	1	0			1
R1935	2	1	1	1	1	20	30	0
R1981	3	1	1	0	1	20	20	0
R2022	3	1	1	1	0			1
R2036	1	1	2	0	0			1
R2056	1	1	2	0	0			1
R206	3	1	1	1	0			0
R2064	1	1	1	0	0			0
R2087	1	1	2	1	0			1
R2096	1	1	1	1	1	5	30	0
R2104	1	1	1	0	0			1
R213	2	1	1	1	1	20	10	1
R2143	2	1	1	0	1	5	25	0
R2177	2	1	1	1	1	20	40	1
R2184	3	1	2	0	0			1
R2188	1	1	1	0	1	20	30	1
R2196	2	1	1	0	1	20	30	1
R231	3	1	1	0	1	20	40	1
R253	3	1	1	0	0			0
R281	3	1	1	0	0			0
R302	3	1	1	0	0			1
R309	1	1	2	0	0			0
R32	1	1	1	1	0			0
R362	3	1	1	1	1	20	28	0
R375	2	1	2	0	0			0
R377	3	1	1	0	0			0
R409	3	1	2	1	0			0
R424	3	1	1	0	0			0
R432	3	1	2	1	0			0
R438	2	1	1	1	1	15	40	0
R457	3	1	1	0	0			0
R55	3	1	1	1	1	40	40	1
R56	1	1	1	1	0			0
R573	2	1	1	1	1	20	10	1
R592	1	1	2	0	0			0
R601	2	1	1	0	0			0
R610	2	1	1	1	1	20	30	0
R669	3	1	1	0	0			0
R67	1	1	1	1	0			0
R683	1	1	1	1	0			0
R711	2	1	2	0	0			0
R715	1	1	1	0	0			0
R718	3	1	1	1	0			0
R744	3	1	2	0	0			0
R75	2	1	2	1	0			0
R750	2	1	1	1	0			0
R762	3	1	1	0	1	20	30	1
R767	3	1	1	1	1	40	40	1
R779	3	1	1	0	0			1
R785	3	1	2	0	0			0
R804	1	1	2	0	0			0
R809	3	1	1	0	1	5	20	0
R810	3	1	2	1	0			0
R818	2	1	1	0	1	40	25	1
R819	2	1	2	1	0			0
R837	3	1	1	1	0			0
R89	3	1	1	1	1	20	20	0
R903	3	1	1	1	1	20	25	0
R916	2	1	1	1	0			0
R922	2	1	1	0	0			0
R927	3	1	1	1	0			0
R942	3	1	1	0	0			0
R961	2	1	1	1	1	20	40	0
R963	3	1	1	1	1		10	1
R976	2	1	2	1	0			0
R991	3	1	1	1	1	6	50	1
GZ104	2	0	2	1	0			0
GZ105	3	0	2	1	0			0
GZ25	1	0	1	0	0			0
GZ62	3	0	1	0	0			0
K1	2	0	1	0	0	0		0
K1000	1	0	1	1	1	20	40	1
K1001	3	0	1	1	0			0
K1002	3	0	1	1	1	13	20	0
K1003	2	0	1	1	0			0
K1004	3	0	1	1	1	20	30	1
K1005	2	0	1	1	1	10	40	0
K1006	2	0	1	1	0			1
K1007	2	0	1	0	1	15	5	1
K1010	2	0	1	0	0			0
K1012	3	0	1	0	1	20	40	1
K1013	2	0	1	0	1	20	35	0
K1015	1	0	1	0	1	20	20	0
K1016	2	0	1	0	1	20	30	1
K1020	3	0	2	0	0			0
K1022	2	0	2	0	0			0
K1023	2	0	2	0	0			0
K1024	1	0	1	0	1	10	35	1
K1025	3	0	1	0	1	30	10	1
K1028	3	0	2	0	0			0
K1030	3	0	2	0	0			0
K1031	2	0	2	0	0			0
K1035	2	0	1	0	1	8	20	1
K1036	3	0	1	0	0			0
K1037	3	0	1	0	0			0
K1039	2	0	2	1	0			0
K1040	1	0	1	1	1	20	40	1
K1043	2	0	1	1	0			0
K1044	2	0	1	1	0			0
K1045	2	0	1	1	0			0
K1046	2	0	1	1	1	20	60	0
K1047	3	0	1	1	1	20	20	0
K1048	3	0	1	1	1	1	20	1
K1049	3	0	1	1	0			1
K1050	3	0	1	0	1	20	20	0
K1051	3	0	1	1	1	50	20	0
K1052	2	0	1	1	1	4	30	1
K1053	3	0	1	1	1	15	50	0
K1055	3	0	1	1	0			0
K1058	3	0	1	0	0			0
K1059	3	0	1	1	0			1
K1060	3	0	1	0	0			0
K1061	2	0	1	1	0			1
K1080	3	0	2	1	0			0
K1082	3	0	1	1	1	20	20	0
K1085	2	0	2	1	0			0
k11	3	0	1	0	1	5	5	0
k110	3	0	1	0	1	20	20	0
K1108	2	0	2	1	0			0
k111	3	0	1	0	1	20	10	0
K1119	3	0	1	0	0			0
K1126	3	0	1	1	0			0
K1135	3	0	2	1	0			0
K1140	2	0	1	1	1	7	30	0
K1146	2	0	1	1	0			0
K1147	3	0	1	1	0			0
K1148	3	0	2	1	0			0
k115	1	0	1	0	0	0		0
K1150	3	0	1	1	0			0
K1151	2	0	1	1	0			1
K1176	2	0	1	1	0			0
K1197	3	0	1	1	1	10	40	0
K1209	2	0	1	1	0			0
K1237	3	0	1	1	0			0
k2	2	0	1	0	0	0		0
k23	2	0	1	0	0	0		0
k44	3	0	1	0	1	20	20	0
k474	2	0	1	0	0	0		0
k477	3	0	1	0	0	0		0
k481	2	0	1	0	1	2	30	1
k497	2	0	2	0	0	0		0
k500	2	0	1	0	0	0		0
k502	3	0	1	0	0	0		1
k513	2	0	1	0	0	0		0
k517	3	0	2	0	0	0		0
k518	3	0	1	0	0			0
k520	2	0	2	0	0	0		0
k556	2	0	1	0	0	0		0
k569	2	0	1	0	1	7	20	1
k574	3	0	1	0	1	40	30	1
k577	3	0	1	0	1	10	20	1
k578	2	0	1	0	1	20	30	1
k586	2	0	1	0	1	20	30	0
k587	3	0	1	0	1	20	20	0
k6	3	0	1	0	0	0		0
k638	1	0	1	0	1	2	2	0
k642	3	0	2	0	0	0		0
k648	3	0	1	0	1	10	20	1
k650	3	0	1	0	0	0		1
k657	2	0	1	0	1	4	4	0
k658	1	0	1	0	1	9	15	0
k668	1	0	2	0	0	0		0
k670	3	0	1	0	1	10	20	1
K768	3	0	1	0	0			0
K769	3	0	2	0	0			1
K774	3	0	1	0	0			0
K775	3	0	1	0	0			1
K776	3	0	1	0	0			1
K777	3	0	1	0	1	25	30	1
K779	2	0	1	0	1	40	43	0
K783	3	0	1	0	1	25	40	1
K784	2	0	1	0	1	10	20	0
K785	3	0	2	0	0			0
K786	3	0	2	0	0			0
K787	2	0	1	0	0			1
K791	2	0	1	0	0			0
K792	2	0	1	0	0			1
K793	3	0	1	0	0			0
K794	2	0	2	0	0			1
K796	2	0	1	0	1	20	20	1
K797	2	0	1	0	0			0
K798	2	0	1	0	0			1
k8	2	0	1	0	1	4	20	0
K802	3	0	1	0	1	20	10	0
K803	3	0	2	0	0			0
K804	3	0	2	0	0			0
K805	2	0	2	0	0			1
K806	2	0	1	0	1	20	9	0
K807	2	0	1	0	1	40	10	0
K812	3	0	2	0	0			1
K813	3	0	1	0	1	20	30	0
K815	3	0	1	0	1	6	5	0
K816	3	0	1	1	1	20	40	0
K817	3	0	1	0	0			0
K818	3	0	1	0	0			1
K819	3	0	1	0	1	8	30	0
K820	3	0	2	0	0			0
K821	3	0	1	0	0			1
K822	2	0	1	0	1	20	30	0
K825	2	0	1	0	0			1
K826	3	0	1	0	0			1
K827	3	0	1	0	1	20	20	0
K829	3	0	1	0	1	20	30	0
K830	3	0	2	0	0			0
K832	2	0	1	0	0			0
K833	3	0	1	0	1	20	30	0
K835	3	0	2	0	0			0
K837	3	0	1	0	0			0
K839	2	0	2	0	0			1
K840	2	0	1	0	0			0
K842	2	0	2	0	0			0
K844	3	0	1	0	1	30	40	0
K846	1	0	1	0	1	20	40	0
k98	3	0	1	0	1	20	10	0
K987	2	0	2	0	0			0
K988	2	0	2	0	0			0
K989	2	0	2	0	0			0
K990	3	0	2	1	0			0
K992	3	0	1	0	1	10	30	1
K993	2	0	1	0	0			1
K994	3	0	2	0	0			0
K995	2	0	1	0	0			0
K996	2	0	2	0	0			0
K997	3	0	1	1	0			1
K998	2	0	1	1	0			1
K999	2	0	2	1	0			0
YZ10	2	0	1	1	1	40	20	1
YZ100	2	0	2	1	0	0		0
YZ102	3	0	2	1	0	0		0
YZ104	3	0	1	1	0			0
YZ106	2	0	2	1	0	0		0
YZ107	3	0	2	1	0	0		0
YZ109	2	0	1	1	0			0
YZ115	3	0	1	1	1	30	40	0
YZ118	3	0	1	1	0			0
YZ121	3	0	1	1	1	30	20	1
YZ122	2	0	1	1	1	40	40	1
YZ129	1	0	1	1	0			0
YZ131	2	0	2	1	0	0		0
YZ136	3	0	1	1	1	50	80	0
YZ137	2	0	1	1	1	30	30	1
YZ138	3	0	1	1	0	0		0
YZ140	2	0	2	1	0	0		0
YZ141	3	0	1	1	0			0
YZ149	3	0	1	1	0			0
YZ150	3	0	1	1	0			0
YZ153	3	0	1	1	0			0
YZ157	2	0	1	1	1	40	20	0
YZ158	3	0	1	1	1	50	30	1
YZ166	2	0	1	1	0			0
YZ170	3	0	2	1	0	0		0
YZ171	3	0	1	1	0			0
YZ172	2	0	1	0	0	0		0
YZ174	3	0	1	0	0	0		0
YZ177	2	0	2	0	0	0		0
YZ179	2	0	1	0	0	0		0
YZ18	3	0	1	1	0			0
YZ180	2	0	1	0	0	0		0
YZ182	3	0	2	0	0	0		0
YZ183	1	0	2	1	0	0		0
YZ186	2	0	1	1	0	0		0
YZ191	3	0	2	1	0	0		0
YZ194	2	0	2	0	1	30	20	0
YZ195	3	0	2	0	0	0		0
YZ197	3	0	2	1	0	0		0
YZ2	3	0	1	1	1	30	40	1
YZ20	3	0	1	1	0			0
YZ200	2	0	1	0	0	0		0
YZ203	3	0	1	1	1	40	40	1
YZ204	3	0	1	0	1	30	30	0
YZ206	3	0	1	1	1	50	20	1
YZ208	2	0	1	1	1	40	20	0
YZ209	2	0	1	1	0	0		0
YZ213	3	0	2	0	0	0		0
YZ214	2	0	1	1	0	0		0
YZ215	2	0	2	1	0	0		0
YZ218	2	0	2	1	0	0		0
YZ219	1	0	2	1	0	0		0
YZ221	2	0	2	0	0	0		0
YZ222	2	0	1	0	0	0		0
YZ223	2	0	2	1	0	0		0
YZ226	2	0	1	1	0			0
YZ228	3	0	2	0	0	0		0
YZ230	3	0	1	1	1	30	10	1
YZ232	3	0	1	0	0	0		0
YZ234	2	0	1	1	0	0		0
YZ235	3	0	1	1	0	0		0
YZ237	3	0	1	0	1	25	20	0
YZ238	2	0	1	0	1	30	40	1
YZ239	3	0	1	1	1	40	20	0
YZ243	1	0	2	1	0	0		0
YZ244	2	0	2	1	0	0		0
YZ249	2	0	1	1	0	0		0
YZ252	2	0	1	0	0	0		0
YZ255	3	0	2	0	0	0		0
YZ256	2	0	2	1	0	0		0
YZ258	2	0	1	1	0	0		0
YZ260	2	0	1	1	0	0		0
YZ261	2	0	1	0	1	8	20	0
YZ263	3	0	1	1	1	40	20	1
YZ264	3	0	1	1	0	0		0
YZ270	3	0	1	0	0	0		0
YZ271	1	0	1	1	0			0
YZ273	3	0	2	0	0	0		0
YZ274	3	0	2	1	0	0		0
YZ275	3	0	1	0	0	0		0
YZ277	2	0	1	1	0	0		0
YZ278	2	0	1	1	1	40	30	1
YZ28	2	0	1	1	1	40	20	0
YZ281	3	0	1	0	1	30	40	1
YZ288	3	0	1	1	0			0
YZ290	2	0	2	1	0	0		0
YZ291	2	0	2	0	0	0		0
YZ299	2	0	1	1	1	20	5	1
YZ300	3	0	2	0	0	0		0
YZ301	3	0	2	0	0	0		0
YZ302	3	0	2	1	0	0		0
YZ303	2	0	1	0	1	30	10	0
YZ307	3	0	1	1	0	0		0
YZ308	2	0	1	0	0	0		0
YZ309	3	0	2	1	0	0		0
YZ311	2	0	1	0	0	0		0
YZ312	2	0	1	1	0			0
YZ314	3	0	2	1	0	0		0
YZ317	2	0	2	0	0	0		0
YZ320	3	0	1	1	0	0		0
YZ321	3	0	1	1	1	40	30	0
YZ323	2	0	2	1	0	0		0
YZ324	1	0	2	1	0	0		0
YZ325	2	0	2	0	0	0		0
YZ327	2	0	1	1	1	20	30	0
YZ329	3	0	1	1	1	30	20	0
YZ330	3	0	2	1	0	0		0
YZ331	2	0	2	0	0	0		0
YZ332	3	0	1	1	0			0
YZ333	2	0	1	1	0	0		0
YZ334	2	0	2	0	0	0		0
YZ335	2	0	1	1	1	40	20	1
YZ336	3	0	1	1	1	30	40	1
YZ338	3	0	1	0	1	30	20	0
YZ34	2	0	1	1	0	0		0
YZ340	2	0	2	1	0	0		0
YZ341	3	0	1	1	1	30	5	1
YZ342	1	0	2	1	0	0		0
YZ344	2	0	2	1	0	0		0
YZ345	1	0	1	1	0	0		0
YZ347	3	0	1	1	0			0
YZ348	3	0	2	1	0	0		0
YZ352	3	0	1	1	1	50	20	0
YZ353	2	0	1	1	1	50	20	0
YZ354	3	0	1	0	1	10	20	1
YZ355	3	0	2	1	0	0		0
YZ356	2	0	1	1	0			0
YZ357	3	0	2	1	0	0		0
YZ358	3	0	2	0	0	0		0
YZ359	3	0	2	1	0	0		0
YZ36	3	0	1	1	0			1
YZ360	3	0	1	0	1	30	40	1
YZ361	2	0	1	0	1	40	60	0
YZ363	3	0	2	0	0	0		0
YZ365	2	0	2	0	0	0		0
YZ366	3	0	2	0	0	0		0
YZ368	3	0	2	1	0	0		0
YZ369	3	0	1	1	0	0		0
YZ37	3	0	1	1	1	40	40	1
YZ370	3	0	1	0	0	0		0
YZ371	3	0	1	0	0	0		0
YZ373	3	0	1	1	1	50	40	1
YZ374	3	0	1	0	0	0		0
YZ375	2	0	2	0	0	0		0
YZ377	3	0	1	1	0	0		0
YZ378	1	0	1	1	0			0
YZ379	2	0	1	1	0	0		0
YZ380	2	0	1	1	0			0
YZ381	2	0	1	1	0			0
YZ382	3	0	2	1	0	0		0
YZ383	3	0	1	1	1	40	10	1
YZ385	2	0	1	0	0	0		0
YZ386	3	0	2	1	0	0		0
YZ387	2	0	2	1	0	0		0
YZ388	2	0	2	0	0	0		0
YZ389	2	0	2	0	0	0		0
YZ390	1	0	1	1	1	40	17	0
YZ391	2	0	1	1	0	0		0
YZ392	3	0	1	1	0	0		0
YZ393	2	0	1	1	0			0
YZ394	2	0	1	1	0			0
YZ396	3	0	1	1	1	50	20	0
YZ397	3	0	1	1	0			0
YZ398	1	0	2	1	0	0		0
YZ399	1	0	2	0	0	0		0
YZ4	3	0	1	1	1	40	20	0
YZ400	2	0	2	1	0	0		0
YZ401	2	0	2	1	0	0		0
YZ403	3	0	1	1	0			0
YZ406	2	0	1	1	0			0
YZ407	3	0	2	0	0	0		0
YZ408	3	0	2	1	0	0		0
YZ409	1	0	1	1	1	20	40	0
YZ411	2	0	2	0	0	0		0
YZ412	2	0	2	1	0	0		0
YZ413	3	0	2	1	0	0		0
YZ415	2	0	2	0	0	0		0
YZ416	2	0	2	1	0	0		0
YZ417	3	0	1	0	0	0		0
YZ419	2	0	2	0	0	0		0
YZ420	3	0	1	1	1	50	30	0
YZ423	3	0	1	1	0			0
YZ424	3	0	2	0	0	0		0
YZ425	3	0	1	1	0			0
YZ426	1	0	1	1	0	0		0
YZ427	1	0	1	1	1	50	60	0
YZ429	2	0	2	1	0	0		0
YZ430	3	0	2	1	0	0		0
YZ431	3	0	1	0	0	0		0
YZ434	3	0	1	1	0	0		0
YZ435	3	0	1	1	0			0
YZ436	2	0	2	1	0	0		0
YZ437	3	0	1	1	0			0
YZ438	2	0	2	0	0	0		0
YZ439	2	0	1	0	1	20	20	1
YZ44	3	0	1	1	1	5	4	0
YZ440	3	0	2	1	0	0		0
YZ441	3	0	2	1	0	0		0
YZ442	2	0	1	1	1	60	20	0
YZ443	3	0	2	1	0	0		0
YZ449	3	0	2	0	0	0		0
YZ450	3	0	2	1	0	0		0
YZ451	3	0	1	1	0			0
YZ453	3	0	2	0	0	0		0
YZ454	2	0	2	1	0	0		0
YZ455	2	0	1	1	1	30	20	0
YZ456	3	0	1	0	0	0		0
YZ457	3	0	1	1	0	0		0
YZ458	3	0	2	0	0	0		0
YZ459	2	0	1	0	0			0
YZ46	2	0	2	1	0	0		0
YZ460	3	0	2	1	0	0		0
YZ461	2	0	1	1	0	0		1
YZ462	3	0	1	1	0			0
YZ465	2	0	1	1	0	0		0
YZ467	1	0	1	0	0	0		0
YZ468	3	0	2	1	1	59	20	0
YZ469	3	0	1	1	1	20	5	0
YZ47	2	0	1	1	1	40	20	1
YZ470	2	0	1	1	0			0
YZ473	3	0	1	0	0			0
YZ474	1	0	1	1	0	0		0
YZ475	3	0	2	1	0	0		0
YZ476	2	0	2	1	0	0		0
YZ477	2	0	1	1	0			0
YZ479	3	0	2	0	0	0		0
YZ480	3	0	1	1	1	50	30	0
YZ481	3	0	1	1	0	0		0
YZ482	2	0	1	1	1	10	10	0
YZ483	3	0	2	1	0	0		0
YZ484	2	0	1	1	1	40	40	1
YZ485	2	0	2	0	0	0		0
YZ486	2	0	2	0	0	0		0
YZ487	3	0	2	1	0	0		0
YZ490	1	0	1	1	0			0
YZ492	2	0	1	1	0	0		0
YZ493	2	0	2	1	0	0		0
YZ494	3	0	1	0	0			0
YZ495	2	0	2	0	0	0		0
YZ496	3	0	2	0	0	0		0
YZ497	3	0	2	1	0	0		0
YZ498	3	0	1	0	1	1	10	1
YZ499	3	0	1	1	1	40	10	0
YZ50	1	0	2	1	0	0		0
YZ500	2	0	2	1	1	20	40	0
YZ501	2	0	2	1	0	0		0
YZ503	3	0	1	1	0			0
YZ504	1	0	1	1	0			0
YZ506	3	0	1	0	0			0
YZ507	2	0	1	1	0			0
YZ508	2	0	2	1	0	0		0
YZ509	1	0	2	1	0	0		0
YZ511	3	0	1	0	0			0
YZ512	2	0	1	0	0			0
YZ513	2	0	1	0	1	30	20	0
YZ514	2	0	1	1	1	40	60	1
YZ515	3	0	1	1	1	10	40	1
YZ516	2	0	1	1	0			0
YZ517	3	0	1	1	0	0		0
YZ518	2	0	1	1	0			0
YZ519	3	0	1	1	1	50	20	0
YZ520	2	0	1	1	0			0
YZ521	2	0	1	0	0			0
YZ522	2	0	1	0	0	0		0
YZ523	3	0	1	0	0			0
YZ524	3	0	1	1	0			0
YZ525	3	0	1	0	0			0
YZ526	2	0	1	0	0			0
YZ527	3	0	1	0	0			0
YZ528	3	0	1	0	1	10	10	0
YZ529	3	0	1	0	0			0
YZ530	3	0	1	1	0	0		0
YZ532	3	0	1	0	0	0		0
YZ533	2	0	1	1	0	0		0
YZ534	2	0	1	1	0			1
YZ535	2	0	1	1	1	30	20	1
YZ536	3	0	1	1	0	0		0
YZ537	3	0	1	1	0			0
YZ538	1	0	1	0	0			0
YZ539	3	0	1	1	0			0
YZ540	1	0	1	0	1	40	30	0
YZ541	3	0	1	1	1	40	30	1
YZ543	2	0	1	0	0			0
YZ545	2	0	2	1	0	0		0
YZ546	3	0	2	1	0	0		0
YZ547	3	0	1	1	0			0
YZ55	3	0	1	1	0			0
YZ551	3	0	1	1	1	40	60	1
YZ552	2	0	1	1	1	20	40	1
YZ553	3	0	2	0	0	0		0
YZ57	3	0	1	1	1	40	20	0
YZ58	1	0	1	1	0			0
YZ64	3	0	1	1	0	0		0
YZ71	3	0	2	1	0	0		0
YZ74	3	0	1	1	0			0
YZ76	3	0	2	1	0	0		0
YZ77	2	0	1	1	1	20	80	1
YZ83	3	0	1	1	0	0		0
YZ87	3	0	1	1	0			0
YZ9	3	0	1	1	0			0
YZ91	3	0	2	1	0	0		0
YZ93	3	0	1	1	0	0		0
YZ94	3	0	2	1	0	0		0
YZ95	2	0	2	1	0	0		0
YZ96	3	0	1	1	0	0		0
YZ97	2	0	1	1	0			0
YZ99	2	0	1	1	1	15	20	1
Z10	3	0	1	0	0			0
Z11	3	0	1	0	1			0
Z5	3	0	1	0	0			0
Z8	3	0	1	0	1			0
